# Supplementary material for: Characterization and expression analysis of WOX2 homeodomain transcription factor in Aegilops tauschii
Source: PubMed Central journal article supplement — Genet Mol Biol. 2014 Mar 17;38(1):79–85. doi: 10.1590/S1415-475738138120140192 (PMC4415562; doi:10.1590/s1415-475738138120140192), 2014-03-17
Supplement: 1415-4757-gmb-38-1-79-suppl01.pdf [file 1415-4757-gmb-38-1-79-suppl01.pdf]

Table S1: Accession numbers of WOX proteins

| Name of protein | Accession no. | Name of protein | Accession no. |
|-----------------|---------------|-----------------|---------------|
| AtWUS           | NM_127349     | OsWOX13         | NM_001051166  |
| AtWOX1          | AY251394      | ZmWUS1          | NM_001112490  |
| AtWOX2          | AY251392      | ZmWUS2          | NM_001112491  |
| AtWOX3          | AY251397      | ZmWOX2A         | AM490235      |
| AtWOX4          | AY251396      | ZmWOX3A         | NM_001112768  |
| AtWOX5          | AY251398      | ZmWOX3B         | NM_001112769  |
| AtWOX6          | AY251399      | ZmWOX4          | AM490237      |
| AtWOX7          | NM_120659     | ZmWOX5A         | AM490238      |
| AtWOX8          | AY251400      | ZmWOX5B         | AM490239      |
| AtWOX9          | AY251401      | ZmWOX9A         | AM490240      |
| AtWOX10         | FM882134      | ZmWOX9B         | AM490241      |
| AtWOX11         | AY251402      | ZmWOX9C         | AM490242      |
| AtWOX12         | AY251403      | ZmWOX11         | NM_001153766  |
| AtWOX13         | AY251404      | ZmWOX13/14      | EU961475      |
| AtWOX14         | NM_101922     | ZmNS1           | NM_001111690  |
| OsNS            | Q33DK1        | ZmNS2           | NM_001111772  |
| OsWUS           | FM882159      | GbWOX2          | FM882124      |
| OsWOX2          | NM_001051294  | GmWOX2          | XM_003539041  |
| OsWOX3          | AM490244      | VvWOX2          | XM_002281125  |
| OsWOX4          | JF836159      | PhWOX2          | EU359005      |
| OsWOX5          | NM_001051372  | FvWOX2          | XM_004295877  |
| OsWOX9A         | AM490240      | StWOX2          | XM_006350850  |
| OsWOX9C         | NM_001187598  | CaWOX2          | XM_004505854  |
| OsWOX11/12      | NM_001067876  | PaWOX2          | AM286747      |
| PtWUSa          | KF982698      | PtWOX13a        | KF982712      |

---

| Name of protein | Accession no. | Name of protein | Accession no. |
|-----------------|---------------|-----------------|---------------|
| PtWOX1a         | KF982699      | PtWOX13b        | KF982713      |
| PtWOX1b         | KF982700      | PtWOX13c        | KF982714      |
| PtWOX2a         | KF982701      | TcWOX1          | XM_007045096  |
| PtWOX2b         | KF982702      | TcWOX2          | XM_007016395  |
| PtWOX4a         | KF982703      | TcWOX4          | XM_007017115  |
| PtWOX4b         | KF982704      | TcWOX5          | XM_007009020  |
| PtWOX5a         | KF982705      | TcWOX11         | XM_007029878  |
| PtWOX5b         | KF982706      | TcWOX13         | XM_007046437  |
| PtWOX6          | KF982707      | GbWUS           | FM882128      |
| PtWOX9a         | KF982708      | GbWOX3A         | FM882125      |
| PtWOX9b         | KF982709      | GbWOX3B         | FM882126      |
| PtWOX11/12a     | KF982710      | GbWOX4          | HF564615      |
| PtWOX11/12b     | KF982711      | GbWOX13         | HF564617      |

---
